# Supplementary material
Source: PubMed Central journal article supplement (PMC2822481)
Supplement: 00585.2009_1.pdf [file 00585.2009_1.pdf]

## 1 **Methods**

2 All experiments were approved by the Institutional Animal Care and Use Committee of Baylor  
3 College of Medicine. The C57BL/6J mice (Jackson Laboratory, Bar Harbor, ME) were fed *ad*  
4 *libitum* (standard rodent diet # 2920, Harlan Teklad) and given free access to water.

5

### 6 ***In situ* hybridization (ISH)**

7 The *glp2r* mRNA expression in the mouse brain was performed using a cellular resolution  
8 approach (1). [1] *Glp2r* cDNA probes. Total RNA was isolated from C57BL/6J mouse whole  
9 brain using RNeasy Mini kit (Qiagen) and used to generate cDNA with Superscript III First-  
10 Strand cDNA Synthesis kit (Invitrogen). The cDNA templates were amplified by PCR using a  
11 forward primer (AAAGATTTGCTCGAGAAACCT) and reverse primer  
12 (AGCACATCTGATGAGCTCTGA) based on the mouse *glp2r* cDNA sequence (BC044746) and  
13 subcloned into pGEM-T easy vector (Promega). After the cDNA clone was digested by  
14 restriction endonucleases (Sall/SacII), GLP-2R cRNA antisense and sense probes were labeled  
15 with digoxigenin (DIG)-UTP by *in vitro* transcription (Roche) with T7 and SP6 RNA  
16 polymerase, respectively. [2] ISH. Frozen brain tissue samples of 8-week-old C57BL/6J mice  
17 were cut at 25  $\mu$ m for coronal and sagittal sections. The sections were fixed with 4% neutral  
18 buffered paraformaldehyde, acetylated in triethanolamine, dehydrated gradually, and quenched  
19 for endogenous peroxidase activity. After permeability with proteinase K, the sections were  
20 hybridized with the DIG-labeled cRNA sense (as a negative control) or antisense probe (100 -  
21 300 ng/mL) at 63.5 °C for 5.5 h, and washed with SSC. The bound probe was incubated with  
22 sheep anti-DIG antibody conjugated with horseradish peroxidase (HRP) (1:250; Roche), reacted  
23 with tyramide signal amplification (NEN, Life Science Products), and detected in blue by alkaline  
24 phosphatase-based chromogen reaction using substrates (5-bromo-4-chloro-3-indolyl phosphate  
25 /nitroblue tetrazolium). [4] Images were captured by an image capture system. Cellular  
26 abundance of *glp2r* mRNA expression was quantified by an automated image processing

27 technique (2), and denoted by a digital false color map representing the original expression  
28 pattern, on which it was painted in yellow, blue, and red, respectively, for the weak, moderate,  
29 and strong expression.

30

### 31 **Primary culture of hippocampal neurons**

32 Neurons were obtained from 1-day-old neonatal mice. The forebrains were removed, and the  
33 hippocampus was dissected in F12 medium. Tissue was digested with L15-NeurobasalA medium  
34 containing 0.1% trypsin and DNAase at 37 °C for 30 min, triturated with a sterile pipette tip on  
35 ice, and centrifuged at 1000 rpm at 4 °C for 5 min. Dissociated cells were resuspended, seeded  
36 onto slides pre-coated with poly-L-lysine for 30 min, and cultured for 5~6 days in NeurobasalA  
37 medium supplemented with B27, 10% FBS, 10 ng/mL FGF $\beta$ , 0.5 mM glutamine, 100 U/mL  
38 penicillin, 100  $\mu$ g/mL streptomycin, and 100  $\mu$ g/mL Primocin (Amixa Inc.). Cytosine- $\beta$ -D-  
39 arabinofuranoside (10  $\mu$ M, Sigma) was added 48 h post plating to inhibit proliferation of glial  
40 cells in the primary culture.

41

### 42 **Immunohistochemistry**

43 Localization of the GLP-2 receptor protein was confirmed by immunohistochemistry. After being  
44 fasted overnight, 8-week-old C57BL/6J mice were deeply anesthetized using pentobarbital,  
45 transcardially perfused with 5 mM EDTA in phosphate saline buffer (PBS), and followed by 4%  
46 paraformaldehyde in PBS. The whole brains were removed, post fixed overnight, and stored at 4  
47 °C in 30% sucrose in PBS. The brain tissues were embedded in OCT at -20 °C, cut at 40  $\mu$ m for  
48 coronal and/or sagittal sections, and post fixed for 15 min. After permeabilized in 0.5% Triton-  
49 100 PBS and blocked in 10% donkey serum in PBS, sections were incubated with primary  
50 antibodies (rabbit GLP-2R, Alpha Diagnostic Intl. Inc.; guinea pig PGP9.5, Millipore Intl.). After  
51 being washed in PBS, sections were incubated with secondary donkey anti-rabbit IgG 488 and

52 donkey anti-mouse (or anti-guinea pig, or anti-chicken) IgG Cy3 (Jackson ImmunoResearch  
53 Laboratories Inc) with TO-PRO-3 (Invitrogen) for nuclear counterstaining. Images were captured  
54 using a confocal laser-scanning microscope (Zeiss LSM 510, Carl Zeiss, Inc.).

55

### 56 **Immunocytochemistry**

57 Hippocampal neurons cultured on glass coverslips on DIV 6 were exposed to 20 nM GLP-2 for  
58 30 min. Cells on coverslips then were fixed in 4% paraformaldehyde in PBS containing 4%  
59 sucrose for 20 min, washed twice in PBS, and preincubated in PBS containing 0.1% Triton X-100  
60 (PBS-TX) and 10% normal donkey serum for 1 hr. Cells were incubated with primary antibodies  
61 (rabbit GLP-2R, Alpha Diagnostic Intl. Inc.; guinea pig PGP9.5, Millipore Intl.; rabbit c-Fos and  
62 chicken GLUT3, Santa Cruz Biotechnology, Inc.). After washes with PBS, cells on coverslips  
63 were incubated with secondary donkey anti-rabbit IgG conjugated with 488 and donkey anti-  
64 mouse (or anti-guinea pig, or anti-chicken) IgG conjugated with Cy3 (Jackson ImmunoResearch  
65 Laboratories Inc) with TO-PRO-3 for nuclear counterstaining. Images were captured using a  
66 confocal laser-scanning microscope.

67

### 68 **The intact cell binding assay**

69 To determine GLP-2-specific binding using a modified protocol (3), we incubated primary  
70 neurons on DIV 6 in 24-well plates of 0.2 mL each with 0 - 1.0 nM <sup>125</sup>I-labeled human GLP-2 (1-  
71 33, Phoenix Pharmaceuticals, Inc.) with or without 0.5 - 10 μM unlabeled human GLP-2 (1-  
72 33, American Peptide Company, Inc.) at 32 °C for 2 h. The neurons were washed in cold 50 mM  
73 Tris buffer (pH 7.4), and centrifuged at 18,000 rpm for 15 min at 4 °C. Bound tracer in pellets  
74 was quantified by a gamma counter; and protein mass in pellets was estimated by the Pierce BCA  
75 protein assay. All assays were performed in triplicate and experiments repeated three times. The  
76 specific binding was calculated by a difference in DPM between total binding and non-specific  
77 binding (in presence of unlabeled GLP-2). The data for the GLP-2 specific binding was simulated

78 using a one-site binding hyperbola nonlinear regression model ( $p < 0.01$ ,  $R^2 = 0.99$ , SigmaPlot),  
79 and the binding affinity was estimated by a disassociation constant ( $K_d$ ).

80

### 81 **The whole-cell voltage clamp**

82 Whole-cell voltage-clamp recordings were performed in cultured hippocampus neurons (4).  
83 Briefly, neurons cultured at DIV  $6 \pm 1$  on a cover glass were transferred into a recording  
84 chamber. The recording chamber was continuously perfused at 5 ml/min with external solution at  
85  $34^\circ\text{C}$  maintained by a temperature controller (TC-324B; Warner Instruments). Whole-cell patch  
86 clamp experiments were carried out using an EPC-9/2 amplifier (HEKA Instruments). Data were  
87 acquired at a sampling rate of 10 KHz. Cell membrane capacitance ( $C_m$ ) and series resistance  
88 were measured and compensated ( $> 90\%$ ). The resistance of the microelectrode was 2-3  $M\Omega$   
89 when filled with the pipette solution. Barium currents ( $I_{Ba}$ ) flowing through  $\text{Ca}^{2+}$  channels were  
90 recorded using an extracellular solution containing: 140 mM TEA-Cl, 2 mM  $\text{MgCl}_2$ , 3 mM  
91  $\text{BaCl}_2$ , 10 mM glucose, 10 mM HEPES (pH 7.4 adjusted with TEA-OH, osmolarity 320); and the  
92 pipette solution containing: 120 mM CsCl, 1 mM  $\text{MgCl}_2$ , 10 mM HEPES, 10 mM EGTA, 4 mM  
93 Mg-ATP and 0.3 mM Na-GTP (pH 7.2 adjusted with CsOH, osmolarity 300 mOsm). To  
94 minimize the “run-down” associated with the whole-cell recording, GTP and ATP were included  
95 in the pipette solution. Data were analyzed using PulseFit software program (HEKA). Whole-cell  
96 current–voltage ( $I$ - $V$ ) curves for individual neurons were generated from voltage step pulse by  
97 calculating the peak inward current at each testing potential. The conductance-voltage ( $G$ - $V$ )  
98 curves were fitted to the following Boltzmann equation (58):  $I = G_{\max}(V_m - E_{Ba}) / 1 + \exp[(V_{1/2} -$   
99  $V_m)/K]$ , where  $G_{\max}$  is the maximal conductance of the barium channel,  $V_m$  is the membrane  
100 voltage,  $E_{Ba}$  is the reversal potential of  $I_{Ba}$  estimated by the curve-fitting program,  $V_{1/2}$  is the  
101 membrane potential for 50% of  $I_{Ba}$  activation, and  $K$  is a voltage-dependent slope factor.

102

### 103 **[ $^3\text{H}$ ]2-deoxy-D-glucose uptake**

104 [<sup>3</sup>H]2-deoxy-D-glucose ([<sup>3</sup>H]2-DG) uptake was determined as previously described (5) with  
105 modifications. Hippocampal neurons on DIV 6 were fasted with serum-free NeurobasalA for 4 h,  
106 and exposed to GLP-2 at 20 nM for 30 min at 37 °C in KRH buffer (125 mM NaCl; 5 mM KCl;  
107 1.8 mM CaCl<sub>2</sub>; 2.6 mM MgSO<sub>4</sub>; 5 mM Hepes, pH 7.4) containing 500 μM 2-deoxy-D-glucose  
108 and [<sup>3</sup>H]2-DG ([1,2-<sup>3</sup>H]-deoxy-D-glucose (30-60 Ci/ mmol, MP Biomedicals, LLC.). When  
109 tested, 10 μM LY294002 (Calbiochem), 10 μM nifedipine (Sigma), or 1 μM protein kinase A  
110 inhibitor amide 14-22 (PKI, Calbiochem) was added 30 min prior to GLP-2 treatment. In some  
111 wells, 50 μM cytochalasin B was added for the background subtraction of nonspecific glucose  
112 uptake. [<sup>3</sup>H]2-DG uptake was stopped by aspiration of the medium. The cells were washed three  
113 times with ice-cold KRH buffer; and lysed at 4 °C for 1 h. Aliquots of 400 μl in duplicates were  
114 assayed for radioactivity by liquid scintillation counting, whereas aliquots of 100 μl were used for  
115 protein content by a BCA protein assay kit (Pierce). Results, which represent facilitative glucose  
116 transporter-mediated uptake and subsequent phosphorylation by hexokinase, were calculated by  
117 subtracting from total counts the portion that was not inhibited by 50 μM of the glucose  
118 transporter inhibitor cytochalasin B (6). The cytochalasin B-sensitive uptake accounted for ~97%  
119 of total [<sup>3</sup>H]2-DG uptake. GLP-2 stimulation (20 nM) for 0, 15, 30, 45, to 60 min linearly  
120 increased 2-DG uptake in hippocampal neurons in a pilot study (data not shown). Thus, a 30-min  
121 stimulation was used to determine the acute effect of GLP-2 on 2-DG uptake in the following  
122 studies. Data are the mean ± SD percentages of control values of triplicate determinations from  
123 three independent experiments.

124

#### 125 **Glucose uptake by 6-NBDG tracing**

126 Fluorescent non-metabolized 6-NBDG was used in place of [<sup>3</sup>H]2-deoxy-D-glucose (7;8).  
127 Neurons on coverslips were loaded with 300 μM 6-NBDG for 5 (or 15) min, washed out,  
128 incubated in KRH buffer for 15 min, washed, and incubated in KRH buffer for 15 min (to allow

129 efflux of residual nonphosphorylated 6-NBDG from the cells). Labeled living neurons were  
130 detected under a fluorescence confocal microscopy.

131

### 132 **Statistical analysis**

133 Data were analyzed by ANOVA (SAS Version 9.1, SAS Institute Inc., Cary, NC). Data were  
134 expressed as means  $\pm$  SE. *P* values < 0.05 or 0.01 were considered statistically significance.

135

136

137

138

### Reference List

- 139 1. **Lein ES, Hawrylycz MJ, Ao N, Ayres M, Bensinger A, Bernard A, Boe AF, Boguski**  
140 **MS, Brockway KS, Byrnes EJ, Chen L, Chen L, Chen TM, Chin MC, Chong J, Crook**  
141 **BE, Czaplinska A, Dang CN, Datta S, Dee NR, Desaki AL, Desta T, Diep E, Dolbeare**  
142 **TA, Donelan MJ, Dong HW, Dougherty JG, Duncan BJ, Ebbert AJ, Eichele G, Estin**  
143 **LK, Faber C, Facer BA, Fields R, Fischer SR, Fliss TP, Frensley C, Gates SN,**  
144 **Glattfelder KJ, Halverson KR, Hart MR, Hohmann JG, Howell MP, Jeung DP,**  
145 **Johnson RA, Karr PT, Kawal R, Kidney JM, Knapik RH, Kuan CL, Lake JH,**  
146 **Laramie AR, Larsen KD, Lau C, Lemon TA, Liang AJ, Liu Y, Luong LT, Michaels J,**  
147 **Morgan JJ, Morgan RJ, Mortrud MT, Mosqueda NF, Ng LL, Ng R, Orta GJ, Overly**  
148 **CC, Pak TH, Parry SE, Pathak SD, Pearson OC, Puchalski RB, Riley ZL, Rockett**  
149 **HR, Rowland SA, Royall JJ, Ruiz MJ, Sarno NR, Schaffnit K, Shapovalova NV,**  
150 **Sivisay T, Slaughterbeck CR, Smith SC, Smith KA, Smith BI, Sodt AJ, Stewart NN,**  
151 **Stumpf KR, Sunkin SM, Sutram M, Tam A, Teemer CD, Thaller C, Thompson CL,**  
152 **Varnam LR, Visel A, Whitlock RM, Wohnoutka PE, Wolkey CK, Wong VY, Wood**  
153 **M, Yaylaoglu MB, Young RC, Youngstrom BL, Yuan XF, Zhang B, Zwingman TA,**  
154 **Jones AR** 2007 Genome-wide atlas of gene expression in the adult mouse brain. *Nature*  
155 445:168-176
- 156 2. **Carson JP, Eichele G, Chiu W** 2005 A method for automated detection of gene  
157 expression required for the establishment of a digital transcriptome-wide gene expression  
158 atlas. *J Microsc* 217:275-281
- 159 3. **Bylund DB, Deupree JD, Toews ML** 2004 Radioligand-binding methods for membrane  
160 preparations and intact cells. *Methods Mol Biol* 259:1-28
- 161 4. **Wu ZZ, Pan HL** 2004 High voltage-activated Ca(2+) channel currents in isolectin B(4)-  
162 positive and -negative small dorsal root ganglion neurons of rats. *Neurosci Lett* 368:96-101
- 163 5. **Burkhalter J, Fiumelli H, Allaman I, Chatton JY, Martin JL** 2003 Brain-derived  
164 neurotrophic factor stimulates energy metabolism in developing cortical neurons. *J*  
165 *Neurosci* 23:8212-8220
- 166 6. **Ebstensen RD, Plagemann PG** 1972 Cytochalasin B: inhibition of glucose and  
167 glucosamine transport. *Proc Natl Acad Sci U S A* 69:1430-1434

- 168 7. **Yamada K, Nakata M, Horimoto N, Saito M, Matsuoka H, Inagaki N** 2000  
169 Measurement of glucose uptake and intracellular calcium concentration in single, living  
170 pancreatic beta-cells. *J Biol Chem* 275:22278-22283
- 171 8. **Yamada K, Saito M, Matsuoka H, Inagaki N** 2007 A real-time method of imaging  
172 glucose uptake in single, living mammalian cells. *Nat Protoc* 2:753-762  
173  
174
